# Supplementary material for: Erratum to: When parents face the death of their child: a nationwide cross-sectional survey of parental perspectives on their child’s end-of life care
Source: Springer Nature journal article supplement (doi:10.1186/s12904-017-0188-x), 2017-02-17
Supplement: MOESM1 [file 12074634]

## List of items of all PaPEQu versions\*

| Support of the family unit domain                                                                                                                                              | Presence in questionnaire version |     |      |     |
|--------------------------------------------------------------------------------------------------------------------------------------------------------------------------------|-----------------------------------|-----|------|-----|
| <p><b>Items assessing parental experience:</b><br/> <i>7 point adjectival scale, never – always</i></p>                                                                        | Card                              | Neo | Neur | Onc |
| (1) I felt taken seriously with the difficult situation my child and I were in.                                                                                                | ✓                                 | ✓   | ✓    | ✓   |
| (2) I could be involved in my child's care as much as I wanted to be.                                                                                                          | ✓                                 | ✓   | ✓    | ✓   |
| (3) a. When I needed respite there was a professional (e.g. nurse, volunteer) who could take my place.                                                                         | ✓                                 | ✓   | ✓    | ✓   |
| (3) b. My privacy was respected.                                                                                                                                               | ✓                                 | ✓   | ✓    | ✓   |
| (4) The care team was aware of my worries and fears.                                                                                                                           | ✓                                 | ✓   | ✓    | ✓   |
| (5) I trusted the healthcare professionals.                                                                                                                                    | ✓                                 | ✓   | ✓    | ✓   |
| (6) What services were offered to you or your child during the child's last four weeks of life?<br><i>List of 10 possible services to choose all those applicable + Other.</i> | ✓                                 | ✓   | ✓    | ✓   |
| <p><b>Items assessing parental needs:</b><br/> <i>7 point adjectival scale, not important at all – very important</i></p> <p>I needed</p>                                      |                                   |     |      |     |
| (7) a. To have a place to sleep in the hospital close to my child.<br>Response option "not applicable" available                                                               | ✓                                 | ✓   |      |     |
| (7) b. To be involved in my child's care.                                                                                                                                      |                                   |     | ✓    | ✓   |
| (8) a. To have a room where my family and I could spend some private time together.                                                                                            | ✓                                 | ✓   |      |     |
| (8) b. To have respite from the care of my child.                                                                                                                              |                                   |     | ✓    | ✓   |
| (9) To share my fears and worries with someone from the healthcare team.                                                                                                       | ✓                                 | ✓   | ✓    | ✓   |
| Communication domain                                                                                                                                                           | Presence in questionnaire version |     |      |     |
| <p><b>Items assessing parental experiences:</b><br/> <i>7 point adjectival scale, never – always</i></p>                                                                       | Card                              | Neo | Neur | Onc |
| (10) Information concerning my child's condition was provided appropriately.                                                                                                   | ✓                                 | ✓   | ✓    | ✓   |
| (11) Bad news was communicated in a sensitive manner.                                                                                                                          | ✓                                 | ✓   | ✓    | ✓   |
| (12) Information I received was contradictory.                                                                                                                                 | ✓                                 | ✓   | ✓    | ✓   |
| (13) My questions were taken seriously by the healthcare team.                                                                                                                 | ✓                                 | ✓   | ✓    | ✓   |
| (14) To get information concerning my child's condition I had to ask.                                                                                                          | ✓                                 | ✓   | ✓    | ✓   |
| (15) I had the impression that the information I received about treatment options was complete.                                                                                | ✓                                 | ✓   | ✓    | ✓   |
| <p><b>How did you experience communication with the attending physicians?</b><br/> <i>7 point adjectival scale, not clear at all – very clear</i></p>                          |                                   |     |      |     |
| (16) In general:<br>Additionally: <i>7 point adjectival scale, not honest – honest</i>                                                                                         | ✓                                 | ✓   | ✓    | ✓   |
| (17) About treatment options to alleviate symptoms:                                                                                                                            | ✓                                 | ✓   | ✓    | ✓   |

\*Card, cardiology; Neo, neonatology; Neur, neurology; Onc, oncology.

|                                                                                                                                                                                                                                                                                                                               |   |   |   |   |
|-------------------------------------------------------------------------------------------------------------------------------------------------------------------------------------------------------------------------------------------------------------------------------------------------------------------------------|---|---|---|---|
| (18) About the prospects and limitations of life-sustaining measures:<br>Additionally: <i>7 point adjectival scale, not honest – honest</i><br>Response option “ <i>not applicable</i> ” available                                                                                                                            | ✓ | ✓ | ✓ | ✓ |
| (19) About what kind of physical changes to expect when my child is dying:<br>Additionally: <i>7 point adjectival scale, not honest – honest</i><br>Response option “ <i>not applicable</i> ” available                                                                                                                       | ✓ | ✓ | ✓ | ✓ |
| (20) Were you informed that your child could die?<br>Yes – No                                                                                                                                                                                                                                                                 | ✓ | ✓ | ✓ | ✓ |
| (21) a. When were you informed that your child could die?<br>Multiple choice: <i>A few days before my child died – Less than 4 weeks before my child died – Less than 6 months before my child died – More than 6 months before my child died</i>                                                                             |   |   | ✓ | ✓ |
| (21) b. When were you informed that your child could die?<br>Multiple choice: <i>Before the birth of my child – Less than 24 hours before my child died – Less than 1 week before my child died – 2 to 4 weeks before my child died</i>                                                                                       |   | ✓ |   |   |
| (21) c. When were you informed that your child could die?<br>Multiple choice: <i>Before the birth of my child – Less than 24 hours before my child died – A few days before my child died – Less than 4 weeks before my child died – Less than 6 months before my child died – More than 6 months before my child died</i>    | ✓ |   |   |   |
| (22) Who informed your child that she/he could die?<br>Multiple choice: <i>It was not possible to inform my child – Myself or the other parent – A physician together with me or the other parent – A physician alone – My child did not want to speak about it – I did not want anyone to speak to my child about dying.</i> |   |   | ✓ | ✓ |

---

**Items assessing parental needs:**

*7 point adjectival scale, not important at all – very important*

I needed

|                                                                             |   |   |   |   |
|-----------------------------------------------------------------------------|---|---|---|---|
| (23) To have the opportunity to ask questions at all times.                 | ✓ | ✓ | ✓ | ✓ |
| (24) To be continuously informed about my child’s condition.                | ✓ | ✓ | ✓ | ✓ |
| (25) To find out how my child would die.                                    | ✓ | ✓ | ✓ | ✓ |
| (26) a. To be informed early about my child’s imminent death.               | ✓ | ✓ |   |   |
| (26) b. To be supported in maintaining hope despite the hopeless situation. |   |   | ✓ | ✓ |

---

**Shared decision making domain**

**Presence in questionnaire version**

**Items assessing parental experiences:**

*7 point adjectival scale, never – always*

|                                                                                                | Card | Neo | Neur | Onc |
|------------------------------------------------------------------------------------------------|------|-----|------|-----|
| (27) I was involved in taking decisions.                                                       | ✓    | ✓   | ✓    | ✓   |
| (28) I was sufficiently informed to contribute to the decisions taken.                         | ✓    | ✓   | ✓    | ✓   |
| (29) I had the opportunity to question prior decisions and to re-discuss them.                 | ✓    | ✓   | ✓    | ✓   |
| (30) Was a decision taken concerning the potential need to resuscitate your child?<br>Yes – No | ✓    | ✓   | ✓    | ✓   |

\*Card, cardiology; Neo, neonatology; Neur, neurology; Onc, oncology.

|                                                                                                                                                                                                                                                                           |   |   |   |   |
|---------------------------------------------------------------------------------------------------------------------------------------------------------------------------------------------------------------------------------------------------------------------------|---|---|---|---|
| (31) Who decided in favor or against potential resuscitation of your child?<br>Multiple choice: <i>The topic was never discussed – Me – The other parent – Us as family – The healthcare team – My family together with the healthcare team – Someone else</i>            | ✓ | ✓ | ✓ | ✓ |
| (32) a. Was the cessation of non-helpful treatments discussed with you?<br>Yes – No                                                                                                                                                                                       |   |   | ✓ | ✓ |
| (32) b. Was the cessation of life-sustaining measures discussed with you?<br>Yes – No                                                                                                                                                                                     |   | ✓ |   |   |
| (33) a. Who decided in favour of or against the cessation of non-helpful treatments?<br>Multiple choice: <i>The topic was never discussed – Me – The other parent – Us as family – The healthcare team – My family together with the healthcare team – Someone else</i>   |   |   | ✓ | ✓ |
| (33) b. Who decided in favour of or against the cessation of life-sustaining measures?<br>Multiple choice: <i>The topic was never discussed – Me – The other parent – Us as family – The healthcare team – My family together with the healthcare team – Someone else</i> |   | ✓ |   |   |
| (34) Did you receive written documentation concerning these decisions?<br>Yes – No                                                                                                                                                                                        |   |   | ✓ | ✓ |

**Items assessing parental needs:**

*7 point adjectival scale, not important at all – very important*

I needed

|                                                                                 |   |   |   |   |
|---------------------------------------------------------------------------------|---|---|---|---|
| (35) To be involved in taking decisions.                                        | ✓ | ✓ | ✓ | ✓ |
| (36) That my personal beliefs and values were considered when taking decisions. | ✓ | ✓ | ✓ | ✓ |
| (37) Not to have the feeling that I had to take decisions all by myself.        | ✓ | ✓ | ✓ | ✓ |
| (38) a. That the cessation of life-sustaining measures was discussed with me.   |   | ✓ |   |   |
| (38) b. That the measures to resuscitate my child were discussed with me.       | ✓ |   |   |   |
| (38) c. That the cessation of non-helpful treatments was discussed with me      |   |   | ✓ | ✓ |

**Relief of pain and other symptoms domain**

**Presence in questionnaire version**

**Items assessing parental experiences:**

*7 point adjectival scale, never – always*

|                                                                                                                                                                                    | Card | Neo | Neur | Onc |
|------------------------------------------------------------------------------------------------------------------------------------------------------------------------------------|------|-----|------|-----|
| (39) It was my impression that my child's discomforts were eased in the best way possible.                                                                                         | ✓    | ✓   | ✓    | ✓   |
| (40) My child's pain was recognized.                                                                                                                                               | ✓    | ✓   | ✓    | ✓   |
| (41) My child's pain was adequately treated.                                                                                                                                       | ✓    | ✓   | ✓    | ✓   |
| (42) Which of the following 3 of your child's discomforts stressed you the most?<br>List of 12 to 17 different symptoms of discomfort to choose from and rate in descending order. | ✓    | ✓   | ✓    | ✓   |

\*Card, cardiology; Neo, neonatology; Neur, neurology; Onc, oncology.

---

**Items assessing parental needs:**

*7 point adjectival scale, not important at all – very important*

I needed

|                                                                                                                         |   |   |   |   |
|-------------------------------------------------------------------------------------------------------------------------|---|---|---|---|
| (43) That my child received enough medication to ease her/his suffering.                                                | ✓ |   | ✓ | ✓ |
| (44) To have physical contact with my child.                                                                            |   | ✓ |   |   |
| (45) That my child was awake and receptive enough to be able to play/speak/or do things with us or other people around. |   |   | ✓ | ✓ |
| (46) That my child received medication to calm her/him.                                                                 |   | ✓ |   |   |
| (47) That my child received complementary and alternative medicine.                                                     | ✓ |   | ✓ | ✓ |
| (48) To be able to use non-pharmacological measures to ease my child's suffering, e.g. massage, tucking.                |   | ✓ |   |   |
| (49) To take my child in my arms.                                                                                       | ✓ |   |   |   |
| (50) That my child received fluids until the end.                                                                       | ✓ |   | ✓ | ✓ |
| (51) That I could give my child milk, either through the tube, with a bottle or a cotton swab.                          |   | ✓ |   |   |

---

**Continuity and coordination of care domain****Presence in questionnaire version****Items assessing parental experiences:**

*5 point Likert scale, strongly disagree - rather disagree – agree partly – rather agree – strongly agree*

Response option “not applicable” available

|                                                                                                                                                                                                                            | Card | Neo | Neur | Onc |
|----------------------------------------------------------------------------------------------------------------------------------------------------------------------------------------------------------------------------|------|-----|------|-----|
| (52) There was a healthcare professional who coordinated my child's care.                                                                                                                                                  | ✓    | ✓   | ✓    | ✓   |
| (53) In the hospital, there was a physician in charge of our case whom I could always talk to.                                                                                                                             | ✓    | ✓   | ✓    | ✓   |
| (54) a. In the hospital, there was a nurse in charge of our case whom I could always talk to.                                                                                                                              | ✓    | ✓   |      |     |
| (54) b. At home, my child's care was mostly provided by the same nurse.                                                                                                                                                    |      |     | ✓    | ✓   |
| (55) Information concerning the condition of my child was appropriately shared among the whole healthcare team.                                                                                                            | ✓    | ✓   | ✓    | ✓   |
| (56) Who mainly supported you in the organization of your child's care during her/his last four weeks of life?<br><i>Multiple choice: List of 10 possible professionals and combinations to choose the most applicable</i> | ✓    |     | ✓    | ✓   |

---

**Items assessing parental needs:**

*7 point adjectival scale, not important at all – very important*

I needed

|                                                                                          |   |   |   |   |
|------------------------------------------------------------------------------------------|---|---|---|---|
| (57) To have a professional from the healthcare team to coordinate the care of my child. | ✓ | ✓ | ✓ | ✓ |
| (58) To have the same physician providing care.                                          | ✓ | ✓ | ✓ | ✓ |
| (59) That my child's care was mostly provided by the same nurses.                        | ✓ | ✓ | ✓ | ✓ |

---

\*Card, cardiology; Neo, neonatology; Neur, neurology; Onc, oncology.

| Bereavement support domain                                                                                                                                                                                                                       | Presence in questionnaire version |   |   |   |
|--------------------------------------------------------------------------------------------------------------------------------------------------------------------------------------------------------------------------------------------------|-----------------------------------|---|---|---|
| <b>Items assessing parental experiences:</b>                                                                                                                                                                                                     |                                   |   |   |   |
| <i>5 point Likert scale, strongly disagree - rather disagree – agree partly – rather agree – strongly agree</i>                                                                                                                                  |                                   |   |   |   |
| Response option “don’t know” available                                                                                                                                                                                                           |                                   |   |   |   |
| (60) I could spend as much time with my dying child as I wanted to.                                                                                                                                                                              | ✓                                 | ✓ | ✓ | ✓ |
| (61) a. I received the necessary support from the healthcare team so that my child could die where I wished.                                                                                                                                     | ✓                                 |   | ✓ | ✓ |
| (61) b. I was supported by the healthcare team in creating mementos of my child.                                                                                                                                                                 |                                   | ✓ |   |   |
| *Card, cardiology; Neo, neonatology; Neur, neurology; Onc, oncology.                                                                                                                                                                             |                                   |   |   |   |
| (62) I could say goodbye to my child in the way I wanted to.                                                                                                                                                                                     | ✓                                 | ✓ | ✓ | ✓ |
| (63) There was solace around my child’s death                                                                                                                                                                                                    | ✓                                 | ✓ | ✓ | ✓ |
| (64) a. Where did your child pass away?<br><i>Multiple choice: In the paediatric intensive care unit – In the adult intensive care unit – On a ward in the paediatric hospital – On a ward in an adult hospital – At home – At another place</i> | ✓                                 |   | ✓ | ✓ |
| (64) b. Where did your child pass away?<br><i>Multiple choice: In the neonatal intensive care unit - In the paediatric intensive care unit - On a ward in the paediatric hospital - At home – At another place</i>                               |                                   | ✓ |   |   |
| (65) Were you with your child when she/he passed away?<br><i>Yes - No</i>                                                                                                                                                                        | ✓                                 | ✓ | ✓ | ✓ |
| (66) Were siblings, other family members and/or friends with your child when she/he passed away?<br><i>Yes - No</i>                                                                                                                              | ✓                                 | ✓ | ✓ | ✓ |
| (67) Did you wash and dress your child or help others to do it after she/he passed away?<br><i>Yes - No</i>                                                                                                                                      | ✓                                 | ✓ | ✓ | ✓ |
| (68) Were you in contact with someone from the healthcare team during the first weeks after the death of your child?<br><i>Yes - No</i>                                                                                                          | ✓                                 | ✓ | ✓ | ✓ |
| (69) Has there been a follow-up meeting with someone from the healthcare team?<br><i>Yes - No</i>                                                                                                                                                | ✓                                 | ✓ | ✓ | ✓ |
| (70) Could you please tell us what kind of support services you used or still use during your bereavement?<br><i>Free text field to describe the kind of service(s).</i>                                                                         | ✓                                 | ✓ | ✓ | ✓ |
| <b>Items assessing parental needs:</b>                                                                                                                                                                                                           |                                   |   |   |   |
| <i>7 point adjectival scale, not important at all – very important</i>                                                                                                                                                                           |                                   |   |   |   |
| I needed                                                                                                                                                                                                                                         |                                   |   |   |   |
| (71) To have the choice of where child might die.<br>Response option “not applicable” available                                                                                                                                                  | ✓                                 | ✓ | ✓ | ✓ |
| (72) That family and friends could say goodbye to my child.                                                                                                                                                                                      | ✓                                 | ✓ | ✓ | ✓ |
| (73) That I was supported by the healthcare team to structure the hours after the death of my child according my needs.                                                                                                                          | ✓                                 | ✓ | ✓ | ✓ |
| (74) To take my child home after her/his death so that family and friends could say goodbye.<br>Response option “not applicable” available                                                                                                       | ✓                                 | ✓ | ✓ | ✓ |
| *Card, cardiology; Neo, neonatology; Neur, neurology; Onc, oncology.                                                                                                                                                                             |                                   |   |   |   |

|                                                                                                                                 |   |   |   |   |
|---------------------------------------------------------------------------------------------------------------------------------|---|---|---|---|
| (75) That someone from the healthcare team attended my child's funeral or burial.<br>Response option "not applicable" available | ✓ | ✓ | ✓ | ✓ |
| (76) To stay in contact with someone from the healthcare team after my child's death.                                           | ✓ | ✓ | ✓ | ✓ |

| Summary                                                                                                                                                                                           | Presence in questionnaire version |     |      |     |
|---------------------------------------------------------------------------------------------------------------------------------------------------------------------------------------------------|-----------------------------------|-----|------|-----|
|                                                                                                                                                                                                   | Card                              | Neo | Neur | Onc |
| <b>Overall, how satisfied were you with the:</b><br><i>7 point adjectival scale, not satisfied at all – neutral - totally satisfied</i>                                                           |                                   |     |      |     |
| (77) Support for you and your family?                                                                                                                                                             | ✓                                 | ✓   | ✓    | ✓   |
| (78) Communication with you and your family?                                                                                                                                                      | ✓                                 | ✓   | ✓    | ✓   |
| (79) Shared decision-making?                                                                                                                                                                      | ✓                                 | ✓   | ✓    | ✓   |
| (80) Relief of pain and other symptoms?                                                                                                                                                           | ✓                                 | ✓   | ✓    | ✓   |
| *Card, cardiology; Neo, neonatology; Neur, neurology; Onc, oncology.                                                                                                                              |                                   |     |      |     |
| (81) Continuation and coordination of care?                                                                                                                                                       | ✓                                 | ✓   | ✓    | ✓   |
| (82) Bereavement support                                                                                                                                                                          | ✓                                 | ✓   | ✓    | ✓   |
| (83) Could you please list three positive experiences concerning the care you and your family received:<br><i>Free text field to list up to three examples.</i>                                   | ✓                                 | ✓   | ✓    | ✓   |
| (84) Could you please list three negative experiences concerning the care you and your family received:<br><i>Free text field to list up to three examples</i>                                    | ✓                                 | ✓   | ✓    | ✓   |
| (85) What areas of your personal life were negatively influenced by the illness and death of your child?<br><i>List of 7 potential areas to choose from; choose all those applicable + Other.</i> | ✓                                 | ✓   | ✓    | ✓   |
| (86) How would you rate your current quality of life on the following scale?<br><i>Vertical visual analogue scale ranging from 0 (worst possible) to 10 (maximum).</i>                            | ✓                                 | ✓   | ✓    | ✓   |
| (87) Is there something else you would like to tell us?<br><i>Free text field to write.</i>                                                                                                       | ✓                                 | ✓   | ✓    | ✓   |

*Note.* The 13 socio-demographic items are excluded from this list.

\*Card, cardiology; Neo, neonatology; Neur, neurology; Onc, oncology.
